# Supplementary material for: Recyclable (Fe3O4-NaYF4:Yb,Tm)@TiO2 nanocomposites with near-infrared enhanced photocatalytic activity
Source: Royal Society of Chemistry journal article supplement (doi:10.1039/c7dt04279e), 2017-12-20
Supplement: c7dt04279e1.pdf [file c7dt04279e1.pdf]

## Supporting Information

### **Recyclable (Fe<sub>3</sub>O<sub>4</sub>-NaYF<sub>4</sub>:Yb,Tm)@TiO<sub>2</sub> nanocomposites with near-infrared enhanced photocatalytic activity**

**Yan Lv,<sup>ab</sup> Lin Yue,<sup>ab</sup> Qian Li,<sup>ab</sup> Baoyi Shao,<sup>ab</sup> Sen Zhao,<sup>ab</sup> Haitao Wang,<sup>c</sup> Shijia Wu<sup>\*ab</sup> and  
Zhouping Wang<sup>\*abc</sup>**

*<sup>a</sup>State Key Laboratory of Food Science and Technology, Jiangnan University, Wuxi 214122, China*

*<sup>b</sup>School of Food Science and Technology, Jiangnan University, Wuxi 214122, China*

*<sup>c</sup>School of Food Science and Technology, Dalian Polytechnic University, Dalian 116034, China*

E-mail: wusj@jiangnan.edu.cn, wangzp@jiangnan.edu.cn

Fax: +86 51085326195.

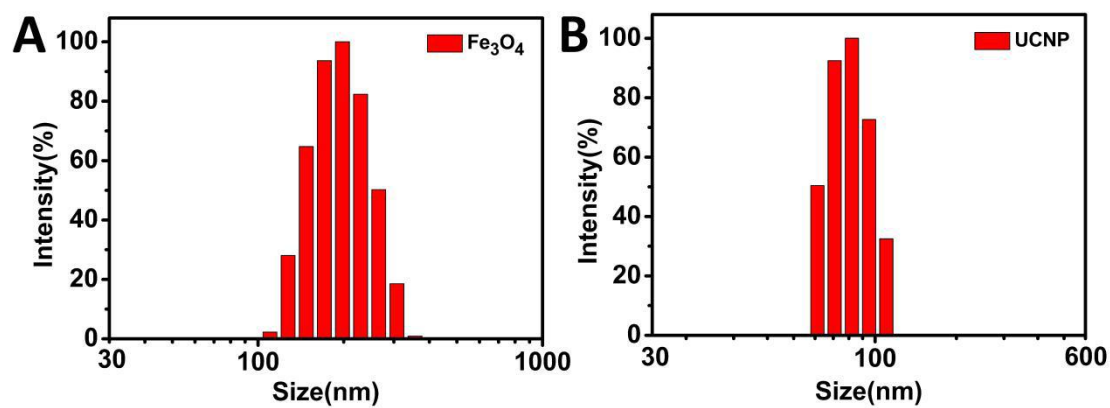

**Figure S1.** The dynamic light scattering (DLS) patterns of the as-prepared samples (A)  $\text{Fe}_3\text{O}_4$  microspheres and (B) UCNPs.

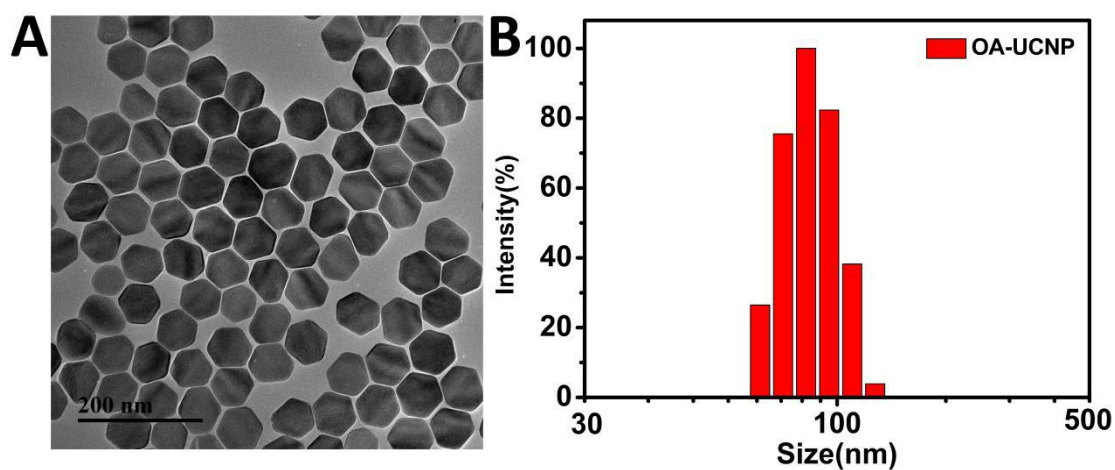

**Figure S2.** (A) TEM image of pristine UCNPs and (B) the corresponding DLS pattern.

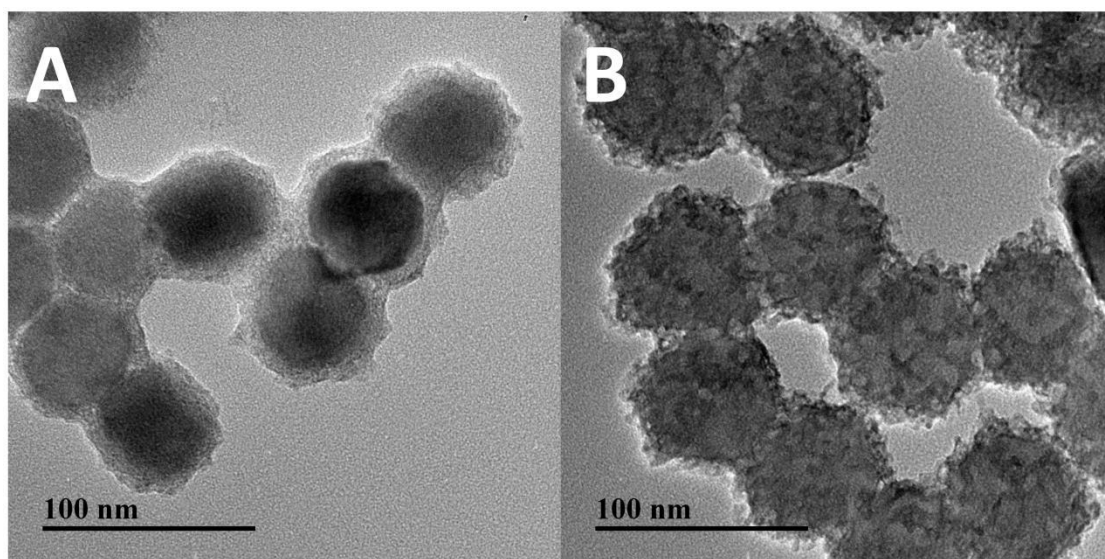

**Figure S3.** The TEM images of core-shell UCNPs@TiO<sub>2</sub> (A) before annealing and (B) after annealing at 500 °C.

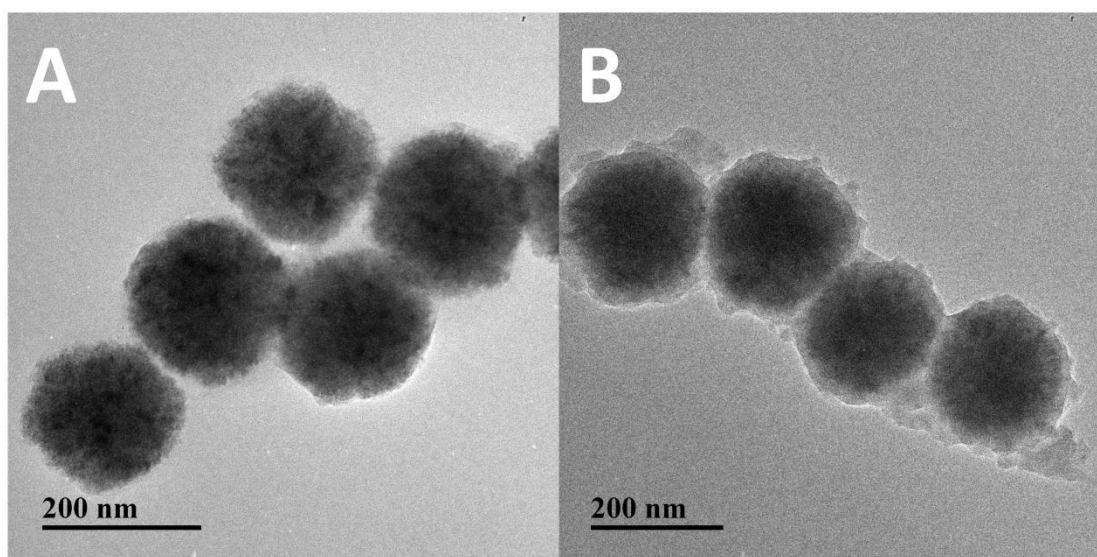

**Figure S4.** The TEM images of (A) Fe<sub>3</sub>O<sub>4</sub> and (B) covered with amorphous TiO<sub>2</sub>.

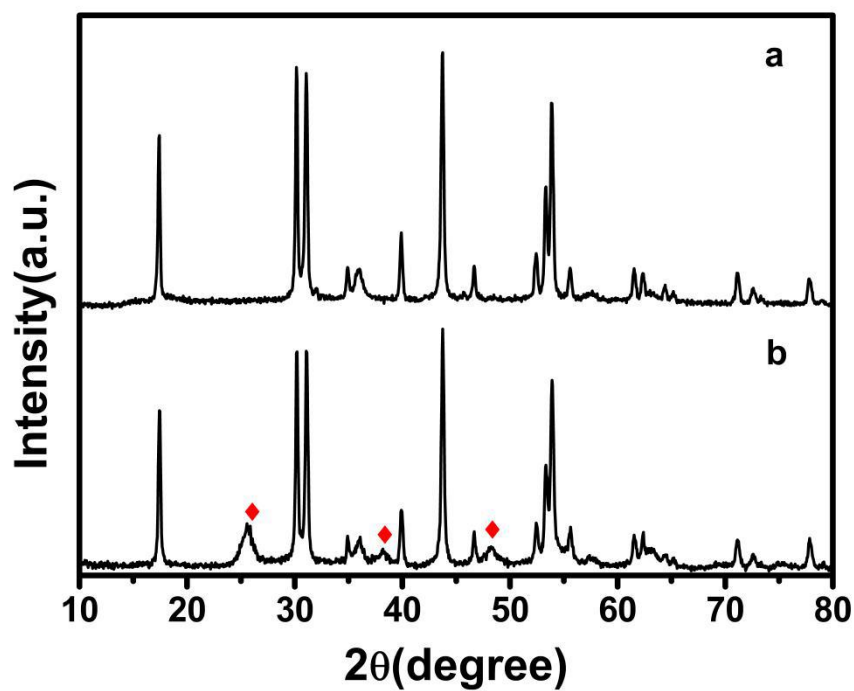

**Figure S5.** XRD patterns of the  $(\text{Fe}_3\text{O}_4\text{-UCNP})@\text{TiO}_2$  composites (a) before calcination and (b) after calcination. Peaks from the anatase  $\text{TiO}_2$  crystal are marked in red.

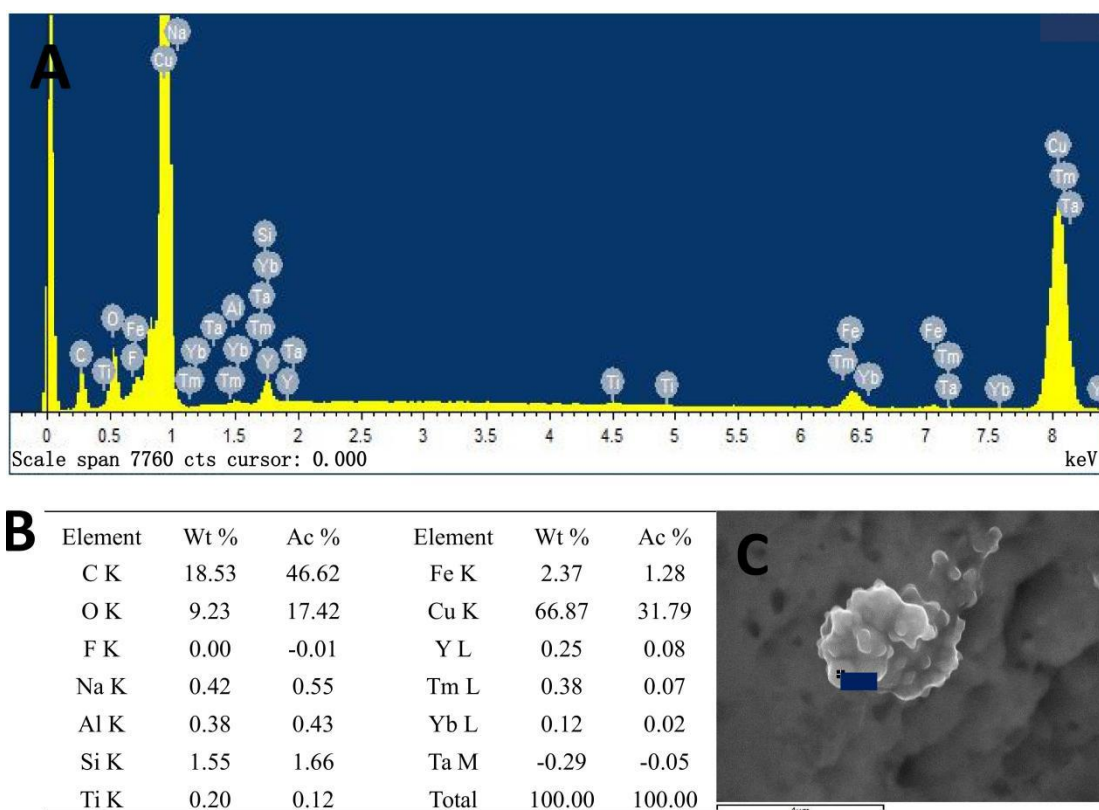

**Figure S6.** (A) The energy dispersive X-ray spectra (corresponding to that point at the blue mark in SEM image), (B) the table containing weight and atomic percentage of each element and (C) the SEM image of the  $(\text{Fe}_3\text{O}_4\text{-UCNP})@\text{TiO}_2$  nanohybrid. Among the all elements, F, Na, Ti, Fe, Y, Tm and Yb ascribe to the samples, whlie the rest elements assign to the copper network.

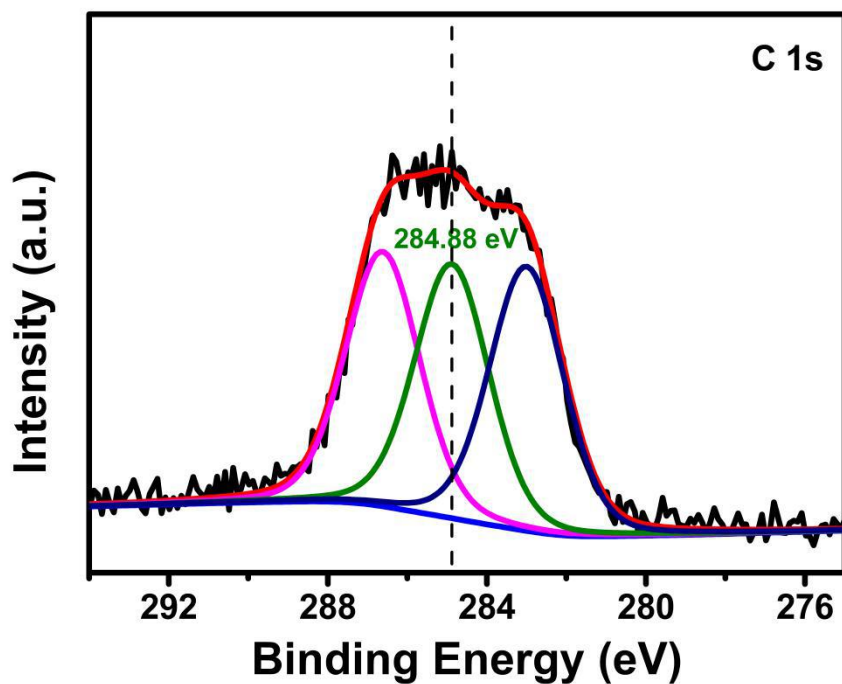

**Figure S7.** High-resolution XPS spectra of (C) C1s for the (Fe<sub>3</sub>O<sub>4</sub>-UCNP)@TiO<sub>2</sub> nanohybrid. According to the formula: the shift of the binding energy ( $\Delta$ ) = the standard peak position of carbon single matter (284.8 eV) - the actual measured peak position of carbon single matter, the shift of the binding energy is 0.08 eV.

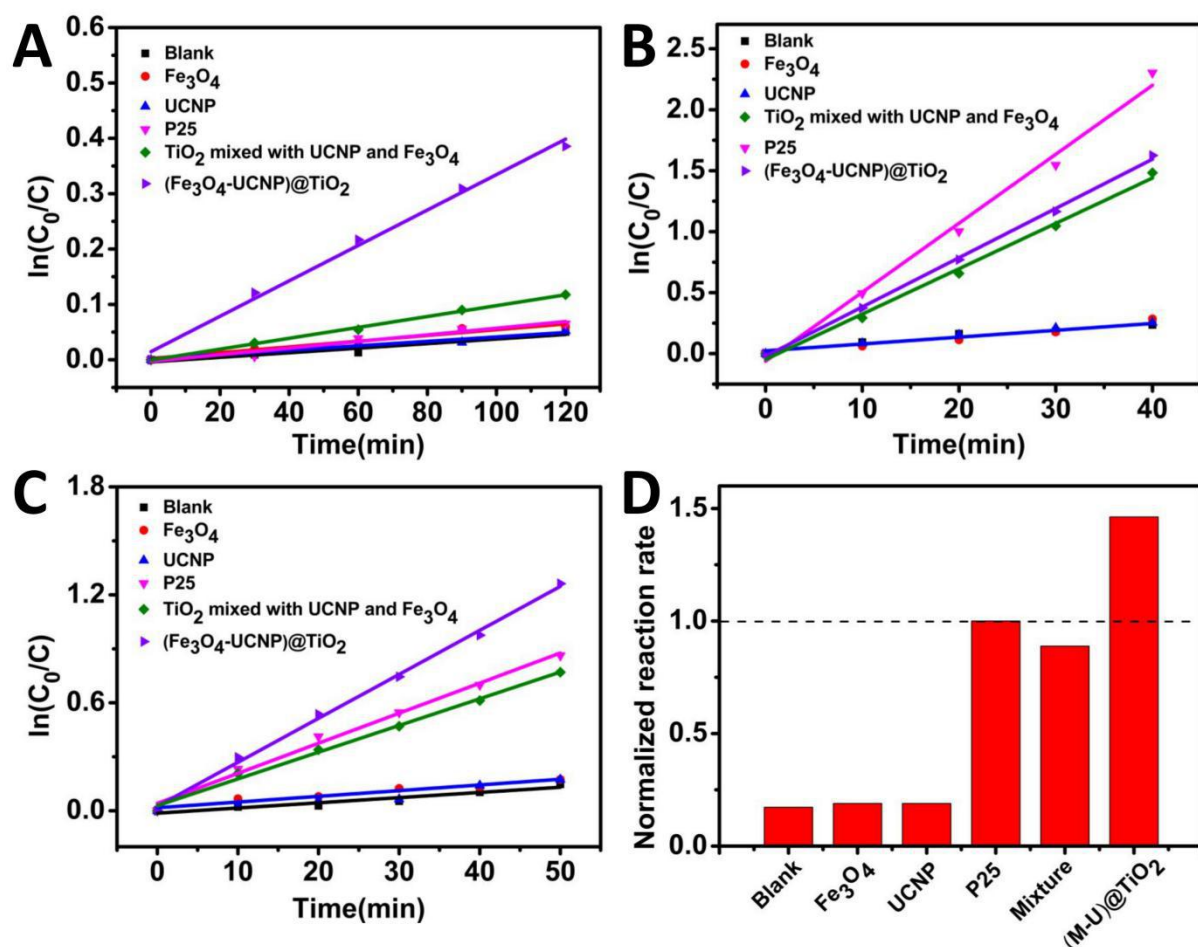

**Figure S8.** Kinetic study of MB degradation in the presence of under (A) NIR (B) UV and (C) simulated sunlight irradiation. (D) Comparison of normalized photocatalytic degradation rate of MB under simulated sunlight irradiation (the group that  $\text{TiO}_2$  is mixed with UCNP and  $\text{Fe}_3\text{O}_4$  is marked as the mixture).

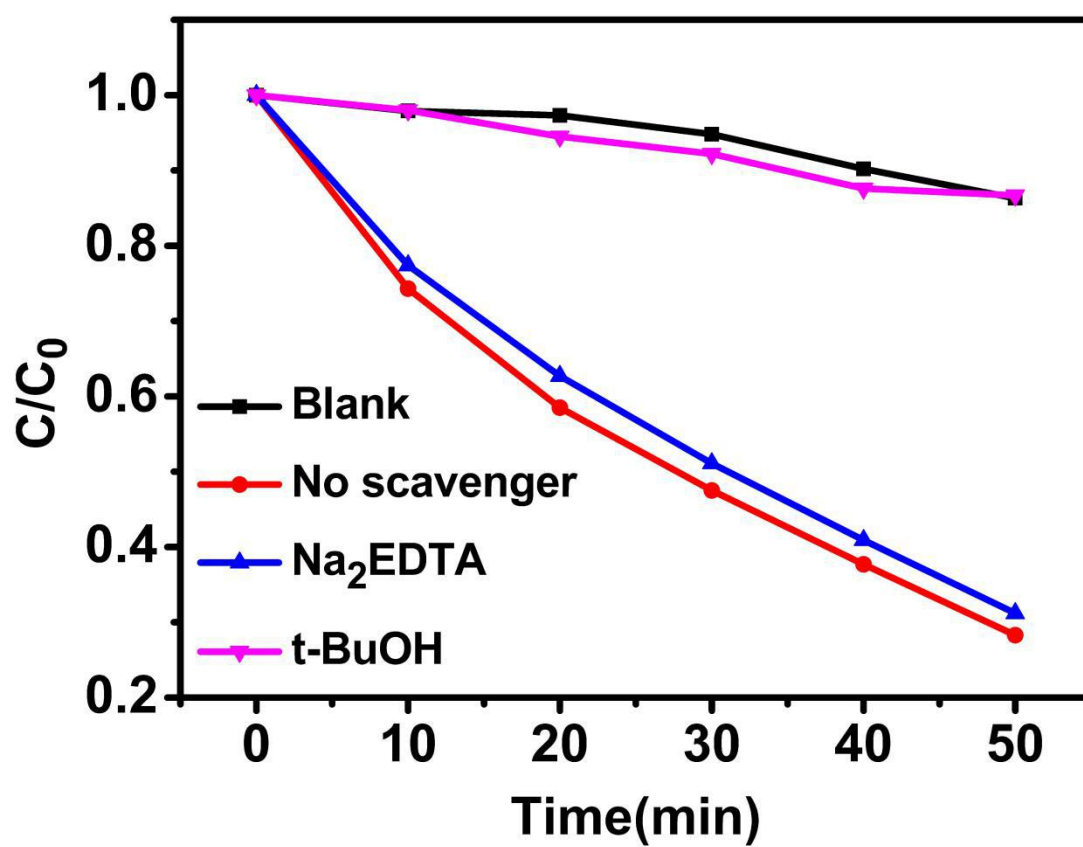

**Figure S9.** Photocatalytic degradation of MB aqueous solution in the presence of and different scavengers under simulated solar light irradiation.
